# Supplementary material for: Berberine Alleviates Olanzapine-Induced Adipogenesis via the AMPKα–SREBP Pathway in 3T3-L1 Cells
Source: MDPI journal article supplement (doi:10.3390/ijms17111865), 2016-11-09
Supplement: s1 [file s1]

# Supplementary Materials: Berberine Alleviates Olanzapine-Induced Adipogenesis via the AMPK $\alpha$ –SREBP Pathway in 3T3-L1 Cells

Yanjie Li, Xiaomin Zhao, Xiyu Feng, Xuemei Liu, Chao Deng and Chang-Hua Hu

## 1. Effects of Treatment with OLZ on 3T3-L1 Differentiation

To detect whether OLZ could enhance adipogenesis, 3T3-L1 cells were exposed to OLZ (0, 1, 10, 50  $\mu$ M) for the first six days of differentiation (Day 0–6). On day 12, cells were stained with ORO (Figure S1A). Results of the microscopic imaging and degree of TG suggested that a concentration of 10  $\mu$ M OLZ could greatest extent augment adipogenesis compared with vehicle control (\*  $p < 0.05$ ), but not 50  $\mu$ M OLZ. 1  $\mu$ M Ros which is a potent PPAR $\gamma$  agonist significantly increased lipogenesis and enhanced about 2-fold TG accumulation (\*\*  $p < 0.01$ ) (Figure S1B).

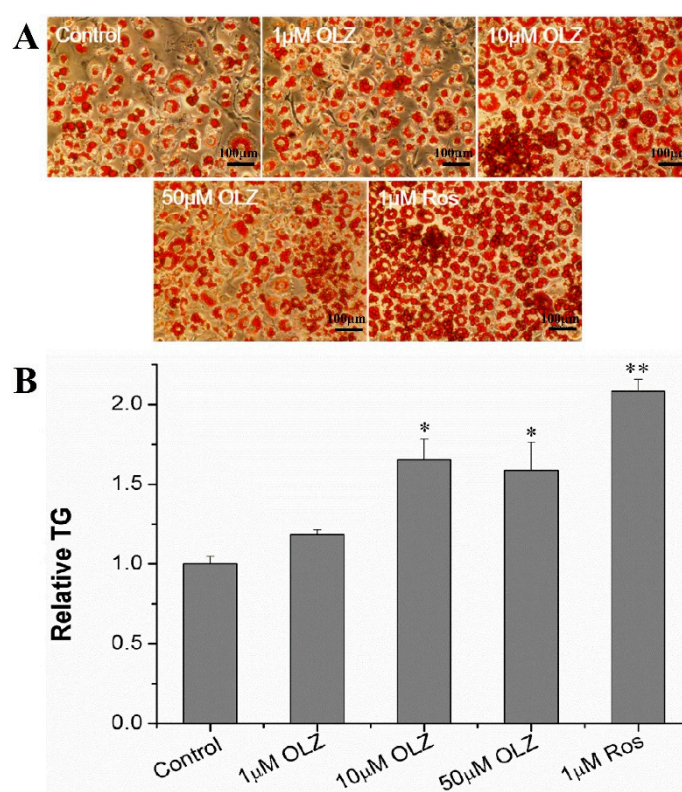

**Figure S1.** The effect of OLZ on 3T3-L1 differentiation. (A) Morphological change and oil droplet accumulation of 3T3-L1 cells differentiation treated with OLZ (0, 1, 10, 50 $\mu$ M); (B) the determination of TG in 3T3-L1 cells treated with OLZ on day 12. Treated with DMSO as vehicle control. Treatment 1  $\mu$ M Ros as positive control group. The values given are the mean  $\pm$  SEM ( $n = 3$ ). (\*  $p < 0.05$  vs. vehicle control, \*\*  $p < 0.01$  vs. vehicle control). Scale bars, 100  $\mu$ m.

## 2. Effects of Treatment with BBR on 3T3-L1 Differentiation

To investigate the inhibitory effect of BBR on lipogenesis, various concentration BBR (0, 0.675, 1.25, 2.5, and 5  $\mu$ M) were loaded to 3T3-L1 cells culture for 6 days. As shown in Figure S2A, the inhibitory effect of BBR on lipogenesis of 3T3-L1 cells was dose-dependent, 5  $\mu$ M BBR could clearly reduce the shape of lipid droplets stained with Oil Red O. 5  $\mu$ M BBR significantly decrease the degree of TG ( $28.95\% \pm 9.2\%$ ) compared to controls (\*\*  $p < 0.01$ ) (Figure S2B).

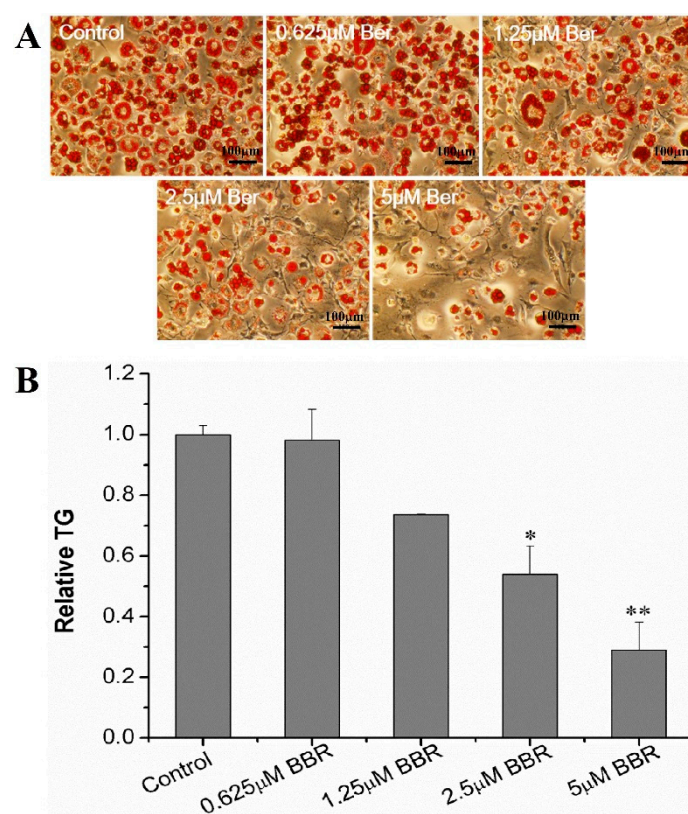

**Figure S2.** The effect of BBR on 3T3-L1 cells differentiation. **(A)** Cell morphology and **(B)** TG accumulation of 3T3-L1 adipocytes treated with BBR alone on day 12. The concentration of BBR respectively are 0, 0.625, 1.25, 2.5 and 5  $\mu$ M. Treatment DMSO as control. Values given are the mean  $\pm$  SEM ( $n = 3$ ). (\*  $p < 0.05$  and \*\*  $p < 0.01$  vs. control). Scale bars, 100  $\mu$ m.
